# Supplementary material for: Parental Perspectives and Experiences in Relation to Lifestyle-Related Practices in the First Two Years of a Child’s Life: A Qualitative Study in a Disadvantaged Neighborhood in The Netherlands
Source: MDPI journal article supplement (doi:10.3390/ijerph17165838), 2020-08-12

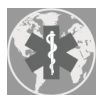

**Supplementary Materials:** The following are available online at [www.mdpi.com/xxx/s1](http://www.mdpi.com/xxx/s1), Figure S1: title, Table S1: title, Video S1: title.

**Table S1. Characteristics of the respondents who participated in the study (total N=38)**

|                                                    |              |
|----------------------------------------------------|--------------|
| <b>Female, n (%)</b>                               | 36 (94.7)    |
| <b>Number pregnant at time of interview, n (%)</b> | 3 (7.9)      |
| <b>Age in years, mean (range)</b>                  | 31.2 (22–41) |
| <b>Education level, n (%)</b>                      |              |
| Low                                                | 3 (7.9)      |
| Middle                                             | 10 (26.3)    |
| High                                               | 17 (44.7)    |
| Missing data                                       | 8 (21.1)     |
| <b>Ethnicity, n (%)</b>                            |              |
| Turkish                                            | 12 (31.6)    |
| Moroccan                                           | 8 (21.1)     |
| Dutch                                              | 6 (15.7)     |
| Other ethnicities                                  | 12 (31.6)    |
| <b>Living with, n (%)</b>                          |              |
| Extended family                                    | 3 (7.9)      |
| Nuclear family                                     | 35 (92.1)    |
| <b>Number of children, n (%)</b>                   |              |
| 1                                                  | 21 (55.3)    |
| 2                                                  | 12 (31.5)    |
| 3                                                  | 3 (7.9)      |
| 4                                                  | 2 (5.3)      |
| <b>Age of infant in months, mean (range)</b>       | 10.0 (2–24)  |
| <b>Age categories of infants, n (%)</b>            |              |
| 0–3 months                                         | 3 (7.9)      |
| 3–6 months                                         | 10 (26.3)    |
| 6–12 months                                        | 7 (18.4)     |
| 12–24 months                                       | 18 (47.4)    |

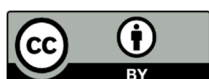

Supplement: s1 [file s1]
